# **The formation of chromatin domains: a new model**

Giorgio Bernardi  
[gbernardi@uniroma3.it](mailto:gbernardi@uniroma3.it)

Science Department, Roma Tre University, Viale Marconi 446, 00146 Rome, Italy, and  
Stazione Zoologica Anton Dohrn, Villa Comunale, 80121 Naples, Italy.

## Abstract

The mechanisms of formation of LADs, the lamina associated domains, and TADs, the topologically associating domains of mammalian chromatin, were investigated here by using as a starting point the observation that chromatin architecture relies on an isochore framework and by doing a new analysis of both isochore structure and the isochore/chromatin domain connection. This approach showed that LADs correspond to isochores from the very GC-poor, compositionally very homogeneous L1 family and from the “low-heterogeneity” L2 (or L2<sup>-</sup>) sub-family; in fact, LADs are compositionally flat, flexible chromatin structures (because of the nucleosome depletion associated with the frequent oligo-A’s) that attach themselves to the nuclear lamina in self-interacting clusters. In contrast, TADs correspond to the increasingly GC-rich isochores from the “high-heterogeneity” L2 (or L2<sup>+</sup>) sub-family and from the H1, H2 and H3 families. These isochores, making the framework of the individual chromatin loops or of the chromatin loop ensembles of TADs, were found to consist of single or multiple GC peaks. The self-interacting single or multiple loops of TADs appear to be shaped by the property that accompany the increasing levels of GC and CpG islands in their isochore peak backbones, namely by an increasing bendability due to decreasing nucleosome density which is accompanied by decreasing supercoiling and increasing nuclease accessibility. In conclusion, chromatin architecture appears to be encoded and molded by isochores, the DNA units of genome organization. This “isochore encoding/molding model” of chromatin domains represents a paradigm shift compared to previously proposed models. Indeed, the latter only rely on the properties of architectural proteins, whereas the new model is essentially based on the physico-chemical properties of isochores and on their differential binding of nucleosomes.

## Introduction

In interphase nuclei, chromatin comprises two sets of domains that are largely conserved in mammals: LADs, the lamina associated domains (~0.5Mb median size), that are scattered over all chromosomes and correspond to GC-poor sequences (1-3), and TADs, the topologically associating domains (0.2-2 Mb in size), a system of GC-rich loops (4-7); many TADs can be resolved into contact domains (0.185 Mb median size (6)).

In spite of the recent, impressive advances in our understanding of chromatin domains (see refs. 8-14, for reviews), the problem of their formation mechanism(s) is still unsolved. Interesting models have been proposed (15-24), but no satisfactory solution has been reached so far. The currently predominant model for TAD formation is the “chromatin extrusion model” (18,19), which proposes that TADs emerge as a consequence of loop extrusion by loop extruding factors (including cohesin), which is limited by boundary elements (including CTCF).

Here, the problem of chromatin domain formation was approached by taking into account the observation that isochores (see ref. 25 for a review) make up the framework of chromatin domains (26) and by having a new look at isochore structure and at the isochore/chromatin domain connection. This approach was applied to human chromosome 21 which was chosen because 1) this chromosome is a good representative of human chromosomes, allowing an extension of the results to all other chromosomes (as investigated in ref. 26); and 2) is the smallest human chromosome, allowing a more expanded graphical presentation of data.

As far as nomenclature is concerned, although TADs comprise, by definition, all the topologically associating domains, in the context of this article TADs will indicate the chromatin domains other than LADs. The main reason for this choice is that the mechanisms of formation of the two sets of domains are different, even if based on the same fundamental DNA property.

## Results

### *Isochore structure: a new analysis*

Figure 1A shows the compositional profile of the DNA sequence from human chromosome 21 as seen through non-overlapping 100Kb windows. This window size was used because 100KB is a plateau value under which the composition of DNA segments show an increasing variance with decreasing size (27) due to several factors (for instance, the distribution of interspersed repeated sequences).

Figures 1B and 1C display the isochore profile as obtained from the chromosome 21 sequence using either a sliding window approach (28,29; Fig. 1B) or a fixed window approach (27, 30; Fig. 1C). Both approaches flatten the compositional profiles by averaging, in two different ways, the fluctuating values of the large regions characterized by “fairly homogeneous” composition, the isochores. In the case of the sliding window approach, remnants of the fluctuations can still be seen as small spikes in GC-rich regions, whereas in the case of the fixed window approach the fluctuations disappear because of the strict averaging procedure applied.

A new, simpler, in fact elementary, approach was used here, namely plotting the individual GC values of 100Kb DNA blocks as points. This approach was suggested by two recent results: 1) correlations hold between isochore properties and the properties of chromatin domains (31); and, more precisely, 2) the framework of TADs and LADs is made up by GC-rich and GC-poor isochores, respectively (26). One may therefore imagine a possible topological similarity between the flat structure of LADs and the loops of TADs on the one hand, and the compositionally flat GC-poor and the compositionally heterogeneous GC-rich isochores, respectively, on the other. If such is the case, clearly a simple 100Kb point-by-point profile of GC levels is preferable not only to both sliding and fixed window approaches, that flatten the compositional profile, but also to the color bar plot of 100Kb DNA segments (Fig. 1A) for graphical clarity reasons.

The point-by-point profile (see Fig. 1D) expectedly showed the compositionally flat region 2 and the H1 and L2 peaks (**a** to **f**) of regions 1 and 3, that were already evident in Figs. 1A, 1B and 1C. It also led, however, to the discovery that the sequences of isochores from H1 (region 4), H2 (region 5) and H3 (region 6) isochores were not simply fluctuating within the compositional borders of the corresponding families (see Supplementary Table S1), but consisted, in fact, of sets of GC peaks. Upon close inspection, these very evident peaks may be seen to correspond to the minute peaks of Fig. 1B, that were flattened by the sliding window approach. Expectedly, the peaks of the point-by-point plots covered a broader GC range compared with the flattened peaks of the sliding window approach, as shown by comparing Fig. 1D with Fig. 1B, and Fig. 1F with Fig. 1E (the high resolution compositional profiles of a multi-peak H2 isochore from chromosome 20).

In purely compositional terms (see Fig. 2 for a larger-scale presentation of the data of Fig. 1D), three different situations were found: 1a) a series of single peaks (regions 1 and 3) corresponding to an H1 isochore (**a**), and to several L2 isochores (**b** to **f**), in which latter case very few points were slightly beyond the “fixed” isochore family borders, but still within the “extended” borders of Supplementary Table S1; 1b) several very sharp H3 single peaks (region 6) that included sequences belonging to the H2 and even to the H1 family, in which case an overall GC range of 18% was reached; 2) a very homogeneous L1 isochore (region 2), in which the overall GC range barely reached 4% and all points were within the “fixed” GC borders of isochore family L1; and 3) two series of GC-rich multi-peak isochores that belonged to H1 (region 4) and H2 (region 5) families in which, again, very few points were slightly beyond the “fixed” isochore family borders. The striking difference between the compositional profile of L1 and H3 isochores is shown in Fig. 2A. Expectedly, when using a higher resolution windows (50Kb; see Supplementary Figure S1) the compositional profiles of isochore peaks became

broader in the GC level gradients and more complex, because of the presence of interspersed repeated sequences and CpG islands (see ref. 27).

### *Isochores and LADs*

It is well established (see refs. 1-3) that LADs 1) may cover ~35% of the human genome; 2) comprise 1,100-1,400 discrete domains demarcated by CTCF sites and CpG islands; 3) have a median size of ~0.5Mb; 4) are scattered over all chromosomes; 5) can be subdivided into cLADs, *i.e.*, “constitutive” LADs present in the four cell types originally tested and fLADs “facultative” LADs, only present in some cell types (in fact, only ~15% of the genome is involved in “stable contacts” present in most cells); 6) are characterized, in the case of cLADs, by conserved positions in syntenic regions of human and mouse chromosomes; 7) show a correspondence of cLADs and ciLADs (the “constitutive inter-LADs”) with GC-poor and GC-rich isochores, respectively.

As shown in Figs. 3A (and 4A,4B), the major LAD of chromosome 21 corresponds to a large L1 isochore (which, incidentally, includes an exceptional GC-poor interLAD; see also the interval in the self-interacting domains corresponding to the L1 isochore in Fig. 4C). The other LADs correspond to the L1 isochores that separate the L2 peaks (to be described below and in the following section), and to a “valley” L2 isochore comprised between two H1 isochores (on the right side of Fig. 3A). Moreover, two LADs flank the centromere; in fact, this appears to be the rule for all human chromosomes, as judged by looking at the results of ref. 26.

In chromosome 20 (Fig. 3B), the largest LAD corresponds to an L2 isochore (interrupted by an interLAD) while several other LADs correspond to L2 valley isochores flanked by H1 isochores; among faint LADs, one (extreme right) corresponds to an H1 isochore comprised between two H2 isochores and two other ones flank the centromere. In the very GC-rich

chromosome 19 (Fig. 3C), two LADs correspond to two H1 isochores flanking an H2 isochore and two other LADs correspond to L2 isochores flanking an H1 isochore; finally, two faint LADs flank the centromere.

These results show that LADs correspond not only to L1 isochores that represent ~19% of the genome (incidentally, not too far from the ~15% involved in “stable contacts”; see ref. 3), but also to L2 isochores and even to H1 isochores in the rare case of very GC-rich chromosomes.

As far as L2 isochores are concerned, it appears (see Supplementary Table 1 and Fig. 1) that 1) some isochores belong to a “low-heterogeneity” L2 sub-family that may be called  $L2^-$ , show a flat profile (see, for example, the largest LAD of chromosome 20); and 2) some other isochores belong to a “high-heterogeneity” L2, or  $L2^+$ , sub-family that are higher in average GC and are in the shape of single peaks (see Figs. 1 A-D and 3A). Now, as shown in Fig. 3,  $L2^-$  isochores correspond to LADs, whereas  $L2^+$  isochores correspond to interLADs and TADs (see the following section). The remaining L2 isochores are generally present as valleys flanked by GC-richer isochores (see Fig. 3A,3B,3C; the relative amounts of L2 sub-families are presented in Supplementary Table S1).

### *Isochores and TADs*

It should be recalled, as a preliminary remark, that the isochores from the five families (L1, L2, H1, H2 and H3) of the human genome (and other mammalian genomes; 32) are characterized not only by increasing GC levels and different short-sequence frequencies, but also by increasing compositional heterogeneities, increasing levels of CpG, CpG islands and Alu sequences and by decreasing levels of LINE sequences and of 5mC/CpG ratios (27,33-37). Moreover, at the chromatin level, GC increases are correlated with higher bendability (38),

higher nuclease accessibility (39,40), lower nucleosome density (41) and lower supercoiling (42,43), all properties linked to DNA sequences.

The connection of the isochores of chromosome 21, as seen in Figs. 1D and 2, with chromatin loops can be described as follows (see Fig. 4A,4B,4C): 1) regions 1 and 3 show a series of H1 (a) and L2 (b to f) isochores in which latter case at least some of their single peaks appear to correspond to individual self-interactions; 2) region 2 is the GC-poorest L1 isochore which corresponds to two self-interactions (separated by an exceptional interLAD); 3) the multi-peak H1 isochores of region 4 correspond to a large interLAD region and to several self-interactions; the two short sequences X and Y, corresponding to LADs, separate region 4 from regions 3 and 5; 4) the small multi-peak H2 isochore (region 5) seems to correspond to a single self-interaction; this may be due to the dense packing of the peaks and/or to a lack of resolution; 5) a series of H3 isochores (red points comprised between two red arrows) correspond to a series of self-interactions comprised between the two red lines on the heat map; in this case, the six H3 isochore peaks correspond to at least three chromatin loops. In conclusion, the two classes of isochores, single-peak and multi-peak, essentially correspond to two classes, single-loop and multi-loop, respectively, of TADs (both of which also show inter-chromosomal interactions; 26).

The correspondence between isochores peaks and self-interactions is improved at a higher resolution of the heat map (compare the high-resolution Fig. S2A with the low resolution Fig. S2B). Likewise, a very good match of isochore peaks with chromatin loops can be seen in the high resolution heatmap of the multipeak H2 isochore of chromosome 20 (see Supplementary Fig. S3).

A very interesting correlation is shown in Fig. 4D, in that regions 1 and 3 to 6 correspond to A compartments (open chromatin) whereas region 2 and the short X and Y sequences correspond to B compartments (closed chromatin; see ref. 15). More precisely, the A



compartment corresponds to multi-peak isochore TADs (regions 1,3,4,5,6), the B compartment to individual LADs (region 2,X,Y), the former being more frequent in telomeric regions.

## Discussion and Conclusion

### *Encoding of chromatin domains by isochores*

Very recent investigations showed that GC-poor and GC-rich isochores should be visualized as the framework of chromatin architecture or, in other words, as the DNA units that underlie LADs and TADs, respectively (26). This was an important step towards the idea that isochores encode chromatin domains. The present results provide a conclusive evidence for this idea, by showing a precise match between the chromatin domains and the isochores of chromosome 21 and by generalizing these results to all human chromosomes.

Indeed, the compositional profiles, the heatmaps and the LAD maps (26) show that: 1) the isochores from the L1 family and the L2<sup>-</sup> sub-family correspond to LADs in all human chromosomes; 2) L2<sup>+</sup> peaks emerging from an L1 background and corresponding to interLADs and TADs are also found in other human chromosomes, although less frequently than in chromosome 21; likewise, H3 peaks also corresponding to interLADs and TADs are present in most human chromosomes; 3) the spikes of the compositional profiles of H1 and H2 isochores of Fig. 1B, that reflect the peaks of Fig. 1D, are regularly present in H1 and H2 isochores from all human chromosomes and correspond to the peaks of point-by-point profiles (Cozzi P. et al., paper in preparation) and to heat map interactions. This general match is important in that the only alternative to the encoding proposed here is that the match of the thousands of LADs and TADs with the corresponding isochores is just a coincidence (and this cannot be *quia absurdum*).

### *Molding of chromatin domains by isochores*

The present results also solve an important open problem, namely the mechanism of formation of chromatin domains. Indeed, LADs should be visualized as chromatin structures corresponding to GC-poor isochores that are flexible, because of the local nucleosome depletions linked to the richness of oligo-A sequences in the corresponding isochores (33,37,44,45; G. Lamolle, H. Musto, G. Bernardi; paper in preparation). LADs only twist and bend in order to adapt and attach themselves to (and even embed in) the lamina, which is reassembled after mitosis (3). Expectedly, this leads to self-interactions (see Fig. 4), as well as to interactions with other LADs from the same chromosomes (26; see, for example, the two LADs bracketed by black lines in Fig. 4). In the case of TADs, the GC gradient within each GC-rich isochore peak is accompanied by properties, increasing levels of CpG, CpG islands and Alu sequences, that lead to increasing nucleosome depletion and bendability and decreasing supercoiling (38-43). These factors constrain the corresponding chromatin to fold into loops.

The models for the formation of LADs and TADs developed in this investigation are presented in Fig. 5, which stresses a keypoint, namely the central role played by the compositional properties of isochores in the formation of chromatin domains. Indeed, the folding model presented here clearly relies on isochore sequences, their nucleosome depletion and the emerging local (in LADs) or extended (in TADs) flexibility of the chromatin fiber.

It should be stressed that this “isochore encoding/molding model” of chromatin domains represents a paradigm shift compared to previously proposed models. Indeed, the latter only rely on the properties of architectural proteins, whereas the new model is essentially based on the physico-chemical properties of isochores and on their differential binding of nucleosomes.

The “isochore encoding/molding model” of chromatin domains is, however, compatible 1) with both the requirements of CTCF binding to close chromatin loops into insulated TADs (46) and the lack of such requirements (47); 2) with the interaction of topoisomerase II beta with

cohesin and CTCF at topological domain borders (48); 3) with an “insulation-attraction model” of TAD formation (9) in which the insulation observed at TAD boundaries may result from stiffness of the chromatin fiber caused by functional elements (CTCF binding sites, highly active transcription starting sites etc) associated with increased nucleosome density and specific local chromatin interactions due to “attractive forces” (not better specified but possibly linked to supercoiling); 4) with the “chromatin extrusion model” (18,19), if the initial attachment of the loop extruder (cohesin) were to coincide with the tips (highest GC levels) of TAD loops.

#### *The “isochore encoding/molding model” vs the “chromatin extrusion model”*

Although, as just mentioned, “the extrusion model” could overlap with the “isochore encoding/molding model”, a question may be raised about which one of the two models is better supported by facts. An answer may come by considering what happens in the case of the “mitotic memory”, namely the rapid and precise re-establishment of the original interphase chromatin domains at the exit from mitosis. In the first case, the basic information required for such quick re-establishment is already present in the sequences of isochores (CTCF may also play an important role in the process). In the second case, the formation of thousands of loops involves the attachment of loop extruding factors (possibly at specific sequences as suggested above) and an extrusion process, which requires a source of energy. It is obvious that the first model relying on well known intrinsic physical properties of DNA is to be preferred to the second one which involves thousands of conjectural loop extruders and an unknown source of energy.

A final point should be made to stress that the models under discussion here concern the basic evolutionarily stable chromatin domains, since, as it is well known, epigenetic modifications and environmental factors may cause changes in chromatin architecture; indeed, while self-associating domains are stable in mammals, chromatin interactions within and between

domains may change during differentiation (49) and evolution (the latter subject will be discussed elsewhere).

### *Isochores as functional genome units*

The present results lead to a new vision of isochores since they not only correspond to a fundamental level of genome structure and organization (50), but also to a set of functional genome units that encode and mold LADs and TADs. Several observations support the above conclusion, three of which are the following: 1) the evolutionary conservation of the isochore patterns in mammals (32); 2) TADs from cells of adult organisms are basic units of replication timing (51) and GC-rich and GC-poor isochores are replication units characterized by all early or all late replicons (52); 3) alterations of the architecture of chromatin domains (both LADs and TADs), known to lead to senescence and diseases (see the review papers cited in the Introduction), are due to changes in their isochore framework. This was predicted by previous investigations on “genomic diseases” (53,54), defined as diseases due to sequence alterations that do not affect genes or classical regulatory sequences, but other sequences that “cause regional changes in chromatin structure”.

The fact that alterations in the chromatin architecture, not affecting genes or classical regulatory sequences, lead to problems in transcription 1) represents the strongest and final objection to the idea of “junk DNA” (see ref. 55, for a review); and 2) has practical implications: indeed, screening even a small human population in terms of chromatin structure in view of detecting “genomic diseases” is simply not feasible at least at the present time. The availability of LADs and TADs maps along sequenced human chromosomes may allow, however, to link alterations at the DNA sequence level with chromatin structure alterations. For instance, the maps

of insertions, deletions and SNPs of Venter's chromosomes (56) in combination with reference chromatin structure maps, might lead to detect problems in Venter's chromatin domains.

### *The large-scale organization of the human genome*

We can now consider a higher level of isochore and chromatin organization. At the DNA level, two "genome spaces" were defined on the basis of gene density (57,58): the gene-poor "genome desert" (L1+L2 isochores) and the gene-rich "genome core" (H1+H2+H3 isochores). In the interphase nucleus, the chromatin corresponding to the genome core showed an internal location and an open structure, whereas the chromatin corresponding to the genome desert showed a peripheral location and a closed structure (see Table 1); moreover, the former showed a preference for (generally GC rich) telomeric regions, the latter for centromeric regions, this preference explaining the polarity of chromosomes in the nucleus (59,60).

The recently proposed chromosome compartments, A and B, characterized by open and closed chromatin, respectively (15), show properties very similar to those just described. In conclusion, the two compartments, A and B (see the compartment profile of chromosome 21 in Fig. 4D) appear to correspond to the two genome spaces, the "genome core" and the "genome desert" (see Table 1). This conclusion is supported by the comparison of sub-compartments with isochore profiles (26).

### *The genomic code*

The encoding of chromatin domains by isochores deserves the name of "genomic code". This definition was originally coined (61,62; see also ref. 25) for two sets of compositional correlations 1) those that hold among genome sequences (for instance, between coding and contiguous non-coding sequences) and among the three codon positions of genes and that reflect

isochore properties; and 2) those that link isochores with all the structural/functional properties of the genome (25,26,31), the latter now including the properties of TADs and LADS. Here it is proposed that the definition of “genomic code” be applied to the encoding of chromatin domains by isochores, since this is in fact the basis for the second set of the correlations just mentioned. Interestingly, the genomic code may be visualized as the fourth, and last, pillar of molecular biology, the first one being the double helix (1951-1953), the second the regulation of gene expression in *E. coli* (1957-1961), and the third the genetic code (1961-1966). In contrast with the other pillars, the genomic code took decades to be established.

### **Acknowledgements**

The author thanks Paolo Ascenzi for hospitality, Giacomo Bernardi, Oliver Clay, and, especially, Kamel Jabbari for critical reading, comments and discussions as well as Caterina Nuvoli for excellent technical help. This research was supported by the Kimura Prize for Molecular Evolution and Evolutionary Genomics conferred to the author (Tokyo, June 2016).

## References:

1. Guelen L, Pagie L, Brasset E, Meuleman W, Faza MB, Talhout W, et al. Domain organization of human chromosomes revealed by mapping of nuclear lamina interactions. *Nature*. 2008;453: 948–51.
2. Meuleman W, Peric-Hupkes D, Kind J, Beaudry JB, Pagie L, Kellis M, et al. Constitutive nuclear lamina-genome interactions are highly conserved and associated with A/T-rich sequence. *Genome Res*. 2013;23: 270–280.
3. Kind J, Pagie L, De Vries SS, Nahidiazar L, Dey SS, Bienko M, et al. Genome-wide Maps of Nuclear Lamina Interactions in Single Human Cells. *Cell*. 2015;163: 134–147.
4. Dixon JR, Selvaraj S, Yue F, Kim A, Li Y, Shen Y, et al. Topological domains in mammalian genomes identified by analysis of chromatin interactions. *Nature*. 2012;485: 376–380.
5. Nora EP, Lajoie BR, Schulz EG, Giorgetti L, Okamoto I, Servant N, et al. Spatial partitioning of the regulatory landscape of the X-inactivation centre. *Nature*. 2012;485: 381–385.
6. Rao SSP, Huntley MH, Durand NC, Stamenova EK, Bochkov ID, Robinson JT, et al. A 3D map of the human genome at kilobase resolution reveals principles of chromatin looping. *Cell*. 2014;159: 1665–1680.
7. Vietri Rudan M, Barrington C, Henderson S, Ernst C, Odom DT, Tanay A, et al. Comparative Hi-C Reveals that CTCF Underlies Evolution of Chromosomal Domain Architecture. *Cell Rep*. 2015;10: 1297–1309.
8. Bonev B, Cavalli G. Organization and function of the 3D genome. *Nat Rev Genet*. *Nature Research*; 2016;17: 661–678.
9. Dixon JR, Gorkin DU, Ren B. Chromatin Domains: The Unit of Chromosome Organization. *Mol Cell*. 2016;62: 668–680.
10. Ghirlando R, Felsenfeld G. CTCF: Making the right connections. *Genes and Development*. 2016. pp. 881–891.
11. Gonzalez-Sandoval A, Gasser SM. On TADs and LADs: Spatial Control Over Gene Expression. *Trends Genet*. 2016;
12. Merkenschlager M, Nora EP. CTCF and Cohesin in Genome Folding and Transcriptional Gene Regulation. *Annu Rev Genomics Hum Genet*. 2016;17: annurev-genom-083115-022339.

- 354 13. Poeschel R, Coraggio F, Meister P, Ahmed K, Dehghani H, Rugg-Gunn P, et al. From single  
355 genes to entire genomes: the search for a function of nuclear organization. Development. Oxford  
356 University Press for The Company of Biologists Limited; 2016;143: 910–23.
- 357 14. Solovei I, Thanisch K, Feodorova Y. How to rule the nucleus: divide et impera. Curr Opin Cell  
358 Biol. 2016;40: 47–59.
- 359 15. Lieberman-Aiden E, van Berkum NL, Williams L, Imakaev M, Ragoczy T, Telling A, et al.  
360 Comprehensive mapping of long-range interactions reveals folding principles of the human  
361 genome. Science. 2009;326: 289–93.
- 362 16. Alipour E, Marko JF. Self-organization of domain structures by DNA-loop-extruding enzymes.  
363 Nucleic Acids Res. Oxford University Press; 2012;40: 11202–12.
- 364 17. Barbieri M, Chotalia M, Fraser J, Lavitas LM, Dostie J, Pombo A, et al. Complexity of chromatin  
365 folding is captured by the strings and binders switch model. Proc Natl Acad Sci U S A. 2012;109:  
366 16173–16178.
- 367 18. Fudenberg G, Imakaev M, Lu C, Goloborodko A, Abdennur N, Mirny LA. Formation of  
368 Chromosomal Domains by Loop Extrusion. Cell Rep. 2016;15: 2038–2049.
- 369 19. Sanborn AL, Rao SSP, Huang S-C, Durand NC, Huntley MH, Jewett AI, et al. Chromatin  
370 extrusion explains key features of loop and domain formation in wild-type and engineered  
371 genomes. Proc Natl Acad Sci USA. National Acad Sciences; 2015;112: E6456–E6465.
- 372 20. Dekker J, Mirny L. The 3D Genome as Moderator of Chromosomal Communication. Cell.  
373 2016;164: 1110–1121.
- 374 21. Di Pierro M, Zhang B, Aiden EL, Wolynes PG, Onuchic JN. Transferable model for  
375 chromosome architecture. Proc Natl Acad Sci. 2016; 201613607.
- 376 22. Rowley MJ, Corces VG. The three-dimensional genome: Principles and roles of long-distance  
377 interactions. Current Opinion in Cell Biology. 2016. pp. 8–14.
- 378 23. Ulianov S V, Khrameeva EE, Gavrillov AA, Flyamer IM, Kos P, Mikhaleva EA, et al. Active  
379 chromatin and transcription play a key role in chromosome partitioning into topologically  
380 associating domains. Genome Res. Cold Spring Harbor Laboratory Press; 2016;26: 70–84.
- 381 24. Vietri Rudan M, Hadjur S. Genetic Tailors: CTCF and Cohesin Shape the Genome During  
382 Evolution. Trends Genet. 2015;31: 651–660.



- 383 25. Bernardi G (2004, reprinted in 2005) *Structural and evolutionary genomics: natural selection in*  
384 *genome evolution*. (Elsevier, Amsterdam). This book is freely available at  
385 [www.giorgiobernardi.eu](http://www.giorgiobernardi.eu)
- 386 26. Jabbari K, Bernardi G. An isochore framework underlies chromatin architecture. Plos One  
387 <http://dx.doi.org/10.1371/journal.pone.0168023>
- 388 27. Costantini M, Clay O, Auletta F, Bernardi G. An isochore map of human chromosomes. Genome  
389 Res. 2006;16: 536–541.
- 390 28. Pavlíček A, Paces J, Clay O, Bernardi G. A compact view of isochores in the draft human  
391 genome sequence. FEBS Lett. 2002;511: 165–9.
- 392 29. Pačes J, Zíka R, Pačes V, Pavlíček A, Clay O, Bernardi G. Representing GC variation along  
393 eukaryotic chromosomes. Gene. 2004;333: 135–141.
- 394 30. Cozzi P, Milanesi L, Bernardi G. Segmenting the human genome into isochores. Evol  
395 Bioinforma. 2015;11: 253–261.
- 396 31. Bernardi G. Chromosome architecture and genome organization. PLoS One. 2015;10.  
397 doi:10.1371/journal.pone.0143739
- 398 32. Costantini M, Cammarano R, Bernardi G. The evolution of isochore patterns in vertebrate  
399 genomes. BMC Genomics. 2009;10: 146. doi:10.1186/1471-2164-10-146
- 400 33. Costantini M, Bernardi G. The short-sequence designs of isochores from the human genome.  
401 Proc Natl Acad Sci U S A. 2008;105: 13971–6.
- 402 34. Meunier-Rotival M, Soriano P, Cuny G, Strauss F, Bernardi G. Sequence organization and  
403 genomic distribution of the major family of interspersed repeats of mouse DNA. Proc Natl Acad  
404 Sci U S A. 1982;79: 355–9.
- 405 35. Soriano P, Meunier-Rotival M, Bernardi G. The distribution of interspersed repeats is  
406 nonuniform and conserved in the mouse and human genomes. Proc Natl Acad Sci U S A.  
407 1983;80: 1816–20.
- 408 36. Varriale A, Bernardi G. Distribution of DNA methylation, CpGs, and CpG islands in human  
409 isochores. Genomics. 2010;95: 25–28.
- 410 37. Arhondakis S, Auletta F, Bernardi G. Isochores and the regulation of gene expression in the  
411 human genome. Genome Biol Evol. 2011;3: 1080–9.

38. Vinogradov AE. DNA helix: The importance of being GC-rich. *Nucleic Acids Research*. 2003. pp. 1838–1844.
39. Di Filippo M, Bernardi G. Mapping DNase-I hypersensitive sites on human isochores. *Gene*. 2008;419:62-65.
40. Thurman RE, Rynes E, Humbert R, Vierstra J, Maurano MT, Haugen E, et al. The accessible chromatin landscape of the human genome. *Nature*. 2012;489: 75–82.
41. Fenouil R, Cauchy P, Koch F, Descostes N, Cabeza JZ, Innocenti C, et al. CpG islands and GC content dictate nucleosome depletion in a transcription-independent manner at mammalian promoters. *Genome Res*. 2012;22: 2399–2408.
42. Naughton C, Avlonitis N, Corless S, Prendergast JG, Mati IK, Eijk PP, et al. Transcription forms and remodels supercoiling domains unfolding large-scale chromatin structures. *Nat Struct Mol Biol*. 2013;20: 387–95.
43. Benedetti F, Dorier J, Burnier Y, Stasiak A. Models that include supercoiling of topological domains reproduce several known features of interphase chromosomes. *Nucleic Acids Res*. 2014;42: 2848–55.
44. Kaplan N, Moore IK, Fondufe-Mittendorf Y, Gossett AJ, Tillo D, Field Y, et al. The DNA-encoded nucleosome organization of a eukaryotic genome. *Nature*. 2009;458: 362–366.
45. Frenkel ZM, Bettecken T, Trifonov EN. Nucleosome DNA sequence structure of isochores. *BMC Genomics*. 2011;12: 203.
46. Nora EP, Lajoie BR, Schulz EG, Giorgetti L, Okamoto I, Servant N, et al. Target degradation of CTCF decouples local insulation of chromosome domains from higher-order genome compartmentalization. doi: <https://doi.org/10.1101/095802>
47. Kubo N, Ishii H, Gorkin D, Meitinger F, Xiong X, Fang R, et al. Preservation of Chromatin Organization after Acute Loss of CTCF in Mouse Embryonic Stem Cells. *bioRxiv. Cold Spring Harbor Labs Journals*; 2017; 118737.
48. Uusküla-Reimand L, Hou H, Samavarchi-Tehrani P, Rudan MV, Liang M, et al. Topoisomerase II beta interacts with cohesin and CTCF at topological domain borders. *Genome Biol*. 2016; 17: 1–22.
49. Dixon JR, Jung I, Selvaraj S, Shen Y, Antosiewicz-Bourget JE, Lee AY, et al. Chromatin architecture reorganization during stem cell differentiation. *Nature*. 2015;518: 331–336.

- 442 50. Bernardi G, Olofsson B, Filipski J, Zerial M, Salinas J, Cuny G, et al. The mosaic genome of  
443 warm-blooded vertebrates. *Science*. American Association for the Advancement of Science;  
444 1985;228: 953–8.
- 445 51. Rivera-Mulia JC, Gilbert DM. Replicating Large Genomes: Divide and Conquer. *Mol Cell*.  
446 2016;62: 756–765.
- 447 52. Costantini M, Bernardi G. Replication timing, chromosomal bands, and isochores. *Proc Natl*  
448 *Acad Sci U S A*. 2008;105: 3433–3437.
- 449 53. Bernardi G. The neoselectionist theory of genome evolution. *Proc Natl Acad Sci U S A*.  
450 2007;104: 8385–90.
- 451 54. Al Mahmud A, Amore G, Bernardi G. Compositional genome contexts affect gene expression  
452 control in sea urchin embryo. *PLoS One*. 2008;3. doi:10.1371/journal.pone.0004025
- 453 55. Palazzo AF, Gregory TR. The Case for Junk DNA. *PLoS Genet*. 2014;10.  
454 doi:10.1371/journal.pgen.1004351
- 455 56. Costantini M, Bernardi G. Mapping insertions, deletions and SNPs on Venter's chromosomes.  
456 *PLoS One*. 2009;4. doi:10.1371/journal.pone.0005972
- 457 57. Bernardi G. The Vertebrate Genome : Isochores and Evolution. *Mol Biol Evol*. 1993;10: 186–  
458 204.
- 459 58. Bernardi G. Isochores and the evolutionary genomics of vertebrates. *Gene*. 2000. 3–17.
- 460 59. Sadoni N, Langer S, Fauth C, Bernardi G, Cremer T, Turner BM, et al. Nuclear organization of  
461 mammalian genomes: Polar chromosome territories build up functionally distinct higher order  
462 compartments. *J Cell Biol*. 1999;146: 1211–1226.
- 463 60. Saccone S, Federico C, Bernardi G. Localization of the gene-richest and the gene-poorest  
464 isochores in the interphase nuclei of mammals and birds. *Gene*. 2002;300: 169–78.
- 465 61. Bernardi G. Le génome des vertébrés : organisation, fonction et évolution. *Biofutur*. 1990. 94 :  
466 43-46.
- 467 62. Bernardi G, Bernardi G. Compositional properties of nuclear genes from cold-blooded  
468 vertebrates. *J. Mol. Evol*. 1986. 33:57-67.
- 469 63. Naumova N, Imakaev M, Fudenberg G, Zhan Y, Lajoie BR, Mirny LA, et al. Organization of the  
470 mitotic chromosome. *Science*. 2013;342: 948–53.

- 471 64. Consortium IHGS. Initial sequencing and analysis of the human genome. *Nature*. 2001;409: 860–  
472 921.
- 473 65. Bernardi G. Misunderstandings about isochores. Part 1. *Gene*. 2001. pp. 3–13.
- 474 66. Jabbari K, Nürnberg P. A genomic view on epilepsy and autism candidate genes. *Genomics*.  
475 2015. 108:31-36.  
476  
477

## 478 **Figure Legends**

479 **Figure 1. A:** Compositional profile (from ref. 30) of human chromosome 21 (release hg38) as seen  
 480 through non-overlapping 100-Kb windows. DNA stretches from isochore families L1 to H3 are  
 481 represented in different colors, deep blue, light blue, yellow, orange, red, respectively. The left-side  
 482 ordinate values are the minima GC values between the isochore families listed on the right side  
 483 (see Supplementary Table S1); **a-f** correspond to an H1 peak (**a**) and to several L2<sup>+</sup> peaks (**b** to **f**;  
 484 the thin yellow bars in peaks **c**, **e** and **f** correspond to single 100Kb blocks that are assigned to the  
 485 H1 family if using “fixed” isochore borders (as shown in the Figure), but to L2 isochores if  
 486 “extended” borders (see Supplementary Table 1) are used. Six regions numbered 1 to 6 (top and  
 487 bottom of the Figure) of the compositional profile are separated by vertical lines or double lines, X  
 488 and Y.

489 **B.** Isochore profile of human chromosome 21 using the matched b37 assembly of ref. 6 and a  
 490 sliding window approach (28,29) with “fixed” isochore borders (from ref. 26). The color  
 491 convention is as in Fig. 1A. This profile is slightly more extended on the centromeric (left) side  
 492 than that of Figs. 1A and 1C.

493 **C.** Isochore profile of human chromosome 21 (release hg38) using a non-overlapping 100Kb  
 494 window and the isoPlotter program (from ref. 30).

495 **D.** GC levels of 100Kb windows of human chromosome 21. This figure shows that individual  
 496 isochores from the L2<sup>+</sup> to H3 families are in the form of peaks. The GC gradients of the peaks do  
 497 not appear in a clear way in the standard presentation of compositional profiles of chromosomes  
 498 (Fig. 1A), except for the broad, isolated H1 (**a**) and L2<sup>+</sup> peaks (**b** to **f**). Upon close inspection,  
 499 however, the peaks of the H1, H2 and H3 isochores of this Figure show a correspondence with the  
 500 small peaks of isochores belonging to H1, H2 and H3 family present in Fig. 1B. Blue and red

arrows delimit regions 2 and 6, respectively. Black, blue and red arrows, as well as X,Y double lines (see Fig. 4 and its legend for additional information) separate regions 3,4 and 5; horizontal lines correspond to minima GC values between isochore families (see legend of Fig. 1A and Supplementary Table 1).

**E.F.** The compositional map of a 2.1Mb region of human chromosome 20, using a sliding window approach (from ref. 28) and the “extended” family borders of Supplementary Table 1 (Fig. 1E), is aligned with the corresponding “point-by-point map” (Fig. 1F, in the Fig. 1D style). The correspondence of five peaks and valleys from the latter (red lines) precisely correspond to the peaks and valleys of the compositional profile; several additional peaks and valleys show a less precise, yet unequivocal correspondence (blue lines). The GC range of the peaks from the bottom profile, 1F, is much larger (about double) than the corresponding one of the top profile, 1E. The whole region may be visualized as a multipeak H2 isochore on the basis of the bottom profile (see also Supplementary Fig. S3).

**Figure 2A.** GC levels of 100Kb windows from L1 and H3 regions of human chromosome 21 comprised between the blue and red arrows (regions 2 and 6) of Fig. 1D, respectively, are displayed at a higher magnification. Horizontal lines correspond to “fixed” minima GC values between isochore families (see Supplementary Table 1). The abscissa scale is in 100Kb units.

**B.C.** GC levels of 100Kb windows from the regions 1,3,4 and 5 of human chromosome 21. See the legend of Fig. 2A for other indications. **C.** Region 4 is delimited by two GC-poor sequences, X and Y, that correspond to LADs (see Fig. 4 and its legend for additional information).

523 **Figure 3. A.** The isochore profile of human chromosome 21 is compared with the (inverted) LAD  
 524 profile (from ref. 3) to show the correspondence of LADs 1) with L1 isochores (blue lines; two  
 525 broken blue lines bracket the largest L1 isochore, in which case the LAD is (exceptionally)  
 526 interrupted by an interLAD); 2) with one L2 “valley” isochore (blue line, last on the right side);  
 527 and 3) with two LADs flanking the centromere. Four “high heterogeneity” L2<sup>+</sup> “peak” isochores  
 528 (red lines) correspond to interLADs, or TADs; the H1 peak right of the centromere corresponds to  
 529 the same interLAD as the first L2<sup>+</sup> peak. Two LADs flank the centromere. The multicolored bar on  
 530 the right is the color code for isochore families.

531 **B.** The isochore profile of human chromosome 20 (see also legend of Fig. 3A) is compared with  
 532 the (inverted) LAD profile (from ref. 3) to show the correspondence of LADs with a large low-  
 533 heterogeneity L2 (L2<sup>-</sup>) isochore (bracketed by broken blue lines; on the left of the panel) which  
 534 includes an interLAD (red line) and with several L2 “valley” isochores (blue lines), as well as the  
 535 correspondence of interLADs with GC-rich isochores (red lines); two faint LADs flank the  
 536 centromere.

537 **C.** The isochore profile of human chromosome 19 (see also legend of Fig. 3A) is compared with  
 538 the (inverted) LAD profile (from ref. 3) to show that two LADs correspond to H1 isochores (blue  
 539 lines) flanking a H2 isochore, an interLAD (red line); two other LADs (on the left) correspond to  
 540 L2 “valley” isochores (blue lines); two faint LADs flank the centromere.

541 **Figure 4.** The compositional profile of human chromosome 21 (**B**, from Fig. 1D), is compared 1)  
 542 with the corresponding LAD profile (**A**; an inverted scale is shown on the top right of the figure);  
 543 2) with the heat map of chromatin interactions (**C**; from ref. 26) and with Fig. 1A on the right side;  
 544 3) with the A/B compartment profile (**D**; data for mid G1 from ref. 63). Regions 1 and 3  
 545 correspond to multiple interactions and to open chromatin; region 2 to multiple interactions and

closed chromatin, as well as to an interLAD. Two double vertical black lines, X and Y, corresponding to LADs (characterized by both self- and intra-chromosomal interactions) and to closed chromatin separate region 4 a multi-peak H1 isochore block corresponding to multiple interactions and open chromatin, from regions 3 and 5. The small multi-peak H2 isochores (region 5) corresponds to a single self-interaction (see text) and to open chromatin (see Text). A telomeric block of H3 isochores (region 6) defined by red points, arrows and lines corresponds to several (at least three) self-interactions on the heat map and to open chromatin.

**Figure 5.** Models for the formation of LADs and TADs. Three chromatin fibers are taken into consideration: **A.** a GC-poor chromatin fiber corresponding to an L1 isochore; blue bar) bounded by CTCF binding sites (green) attaches to the lamina, forming a LAD; the wavy profile indicates the physical adaptation by bending and twisting to (and embedding in) the lamina due to nucleosome depletion associated with oligo-A sequences (yellow stripes), as well as the self-interactions. **B.** a GC-rich chromatin fiber corresponding to an H3 isochore folds upon itself forming a single-loop TAD bounded by CTCF-binding sites (green); yellow to red color indicate an increasing GC level which is responsible for the folding due to nucleosome depletion associated with increasing GC, CpG islands and Alu sequences. **C.** A GC-rich chromatin fiber corresponding to an H1 (or H2) isochore characterized by two GC peaks folds to form a TAD which comprises two loops and two contact domains.



566

| <b>TABLE 1. GENOME ORGANIZATION: DNA AND CHROMATIN (a)</b> |                                           |                                             |
|------------------------------------------------------------|-------------------------------------------|---------------------------------------------|
| <b>2 Genome spaces (57,58)</b>                             | <b>Genome core<br/>GC-rich, gene-rich</b> | <b>Genome desert<br/>GC-poor, gene-poor</b> |
| <b>2 Nuclear locations (59,60)</b>                         | <b>Internal</b>                           | <b>Peripheral</b>                           |
| <b>2 Chromatin structure (60)</b>                          | <b>Open</b>                               | <b>Closed</b>                               |
| <b>2 Replication timings (51,52)</b>                       | <b>Early</b>                              | <b>Late</b>                                 |
| <b>2 Genome compartments (15)</b>                          | <b>A, open chromatin</b>                  | <b>B, closed chromatin</b>                  |
| <b>5 Isochore families (25)</b>                            | <b>L2<sup>+</sup>, H1, H2, H3</b>         | <b>L1, L2<sup>-</sup></b>                   |
| <b>2 Chromatin domains (3-7)</b>                           | <b>TADs</b>                               | <b>LADs</b>                                 |

567

568

569

(a) see heading “The large-scale organization of the Human genome” in the Discussion section of the manuscript for a description of this Table.

570

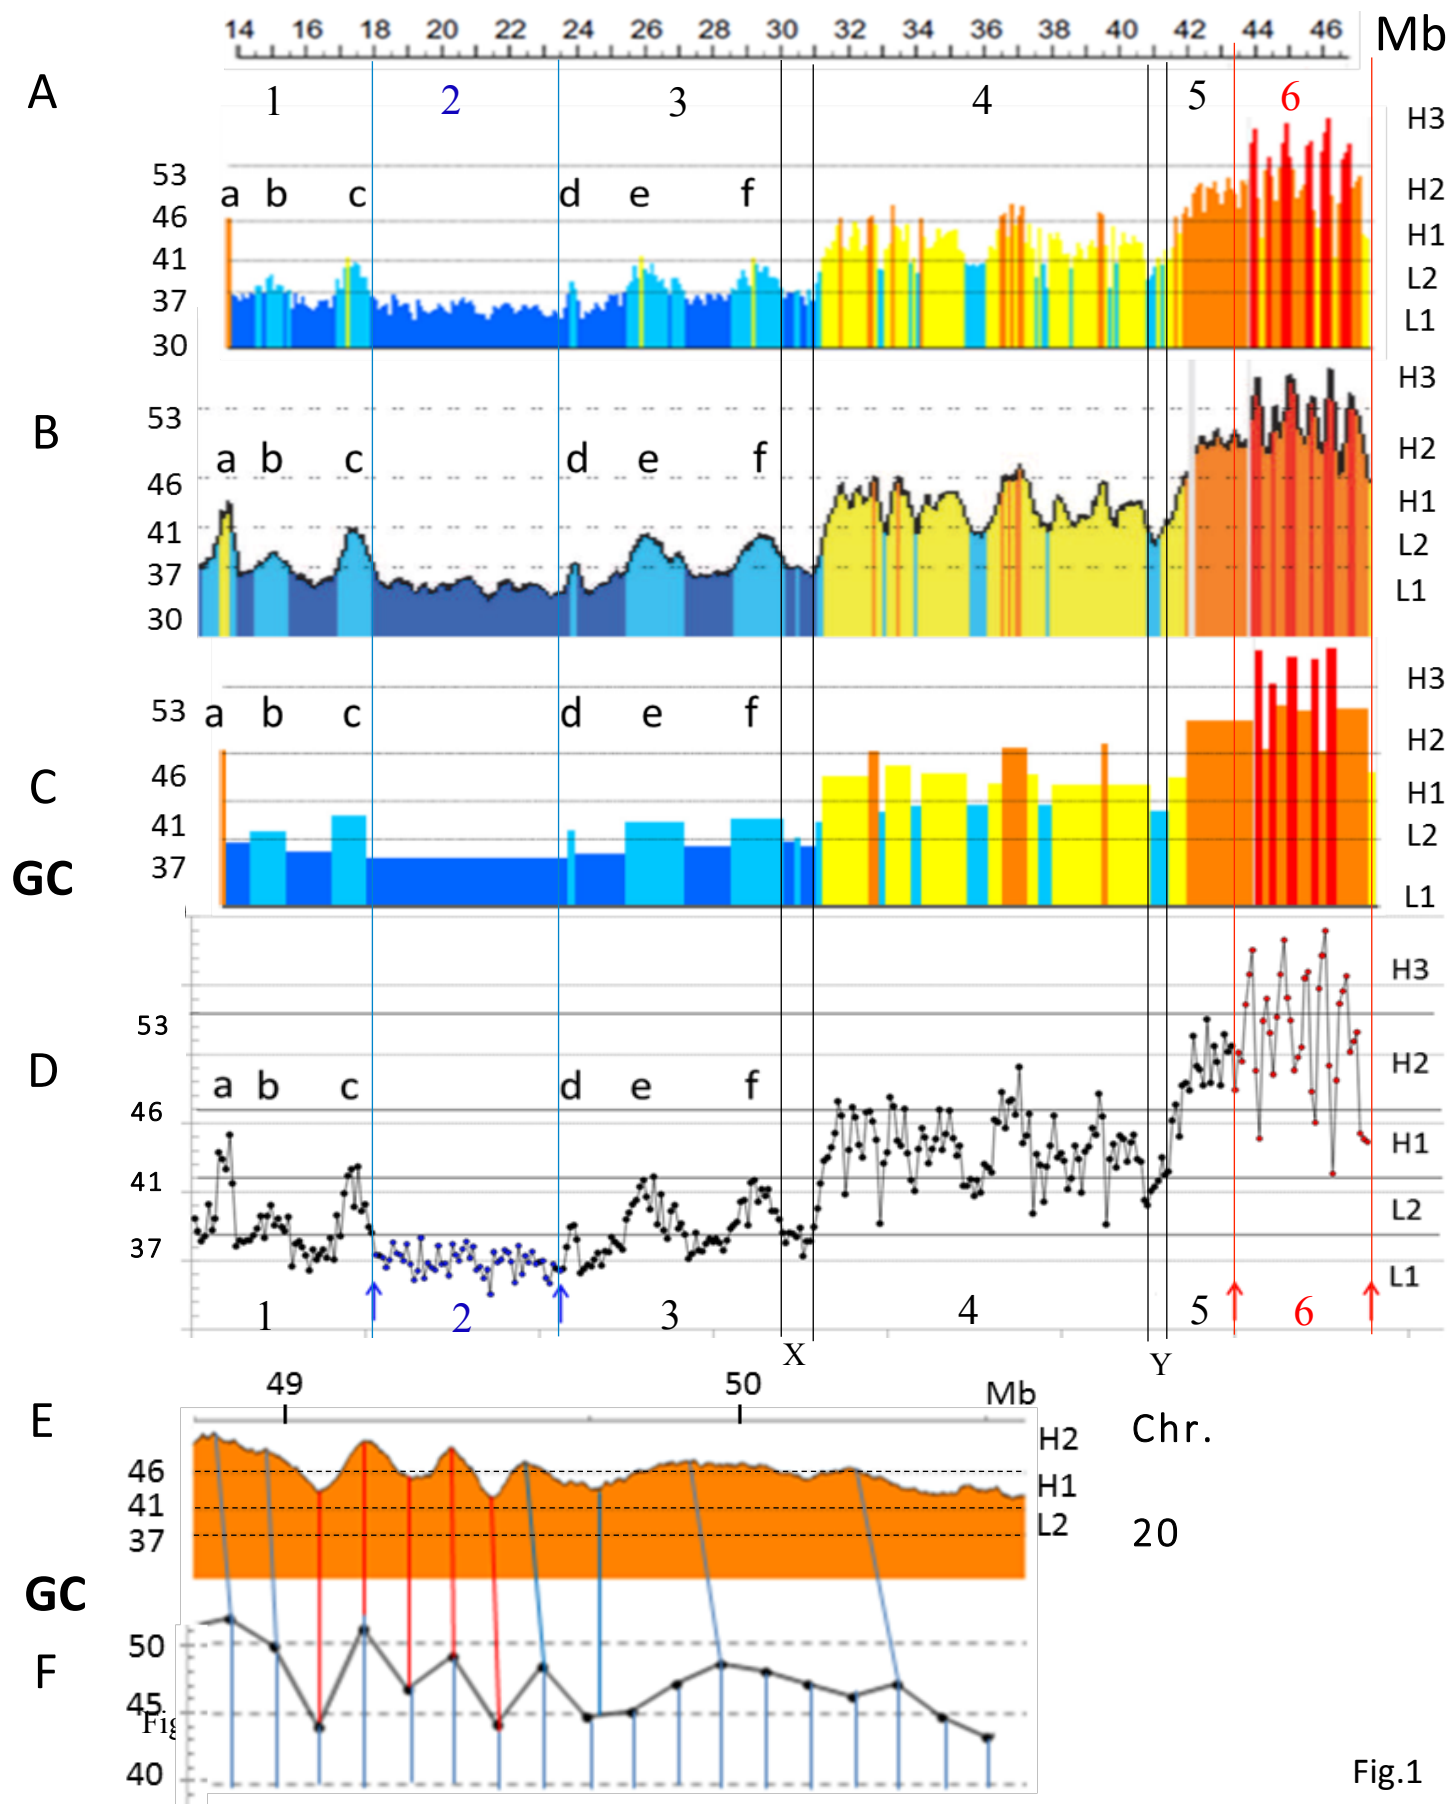

Fig.1

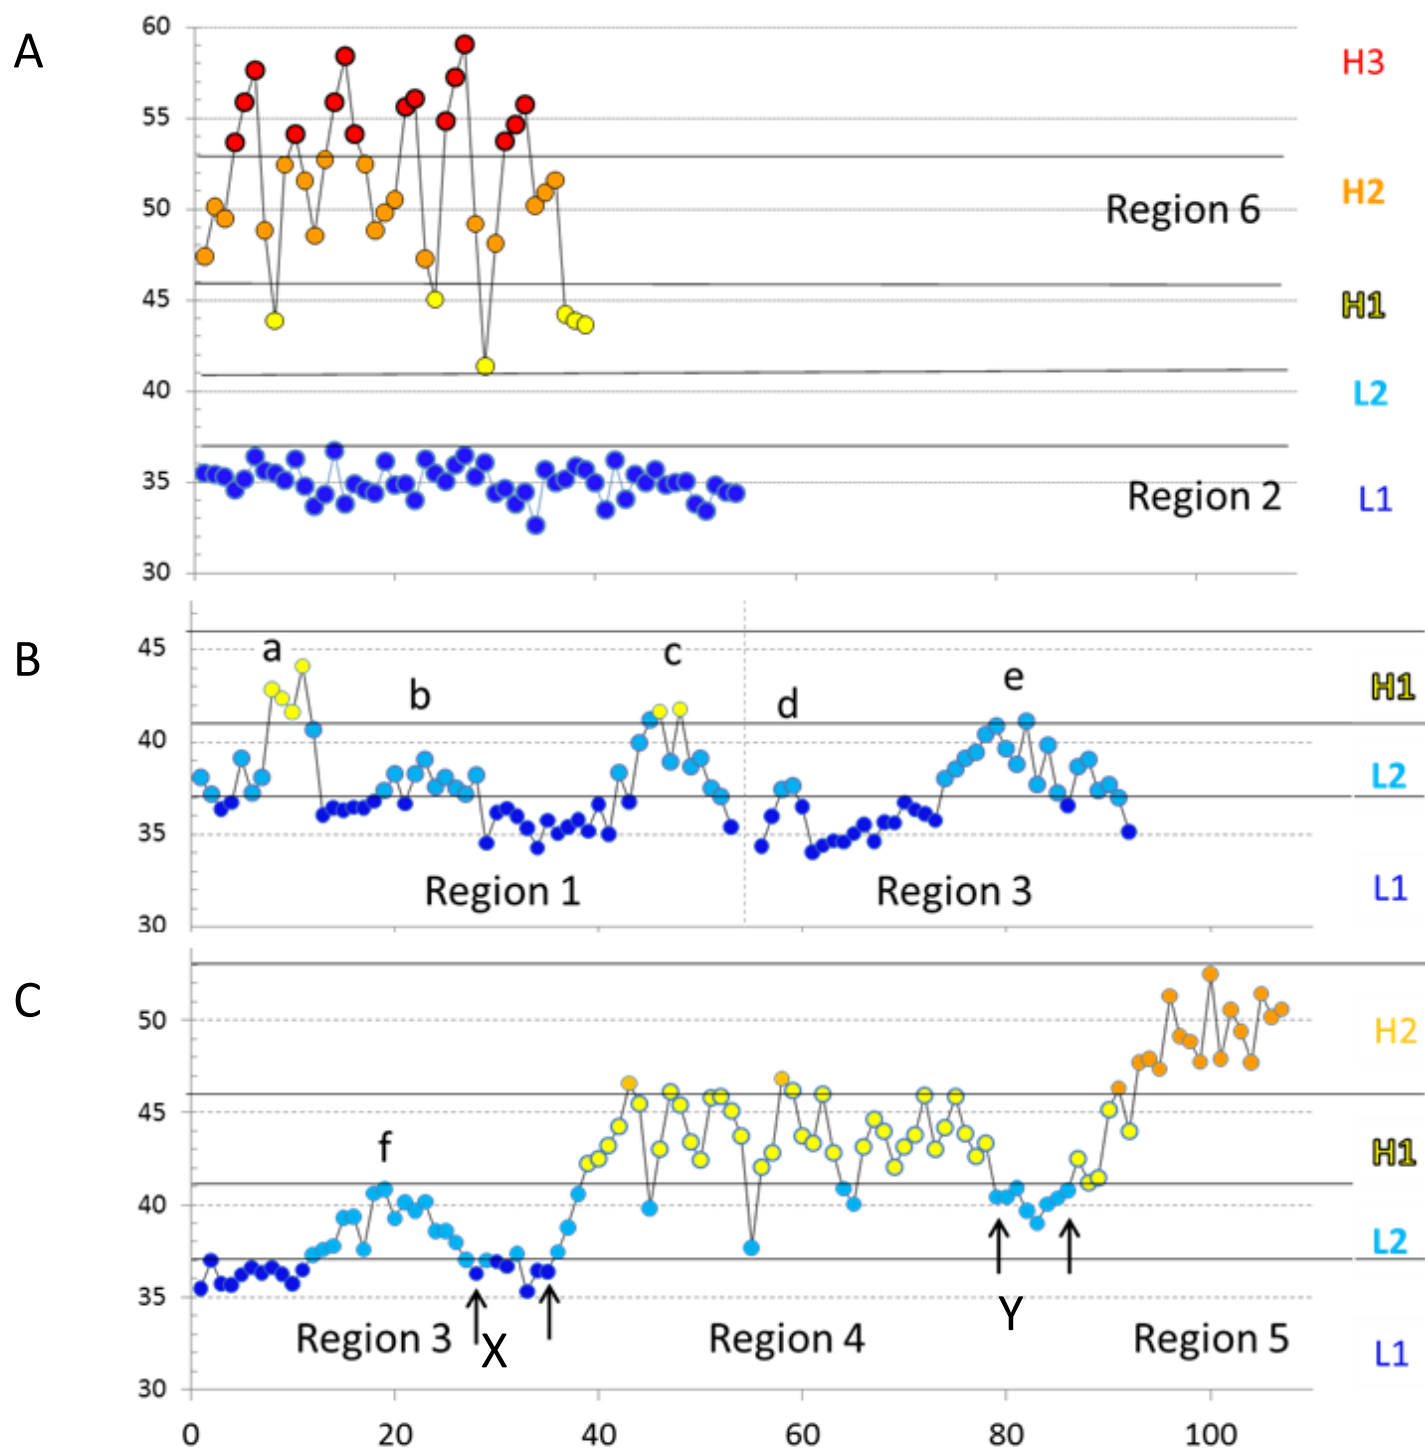

Fig. 2

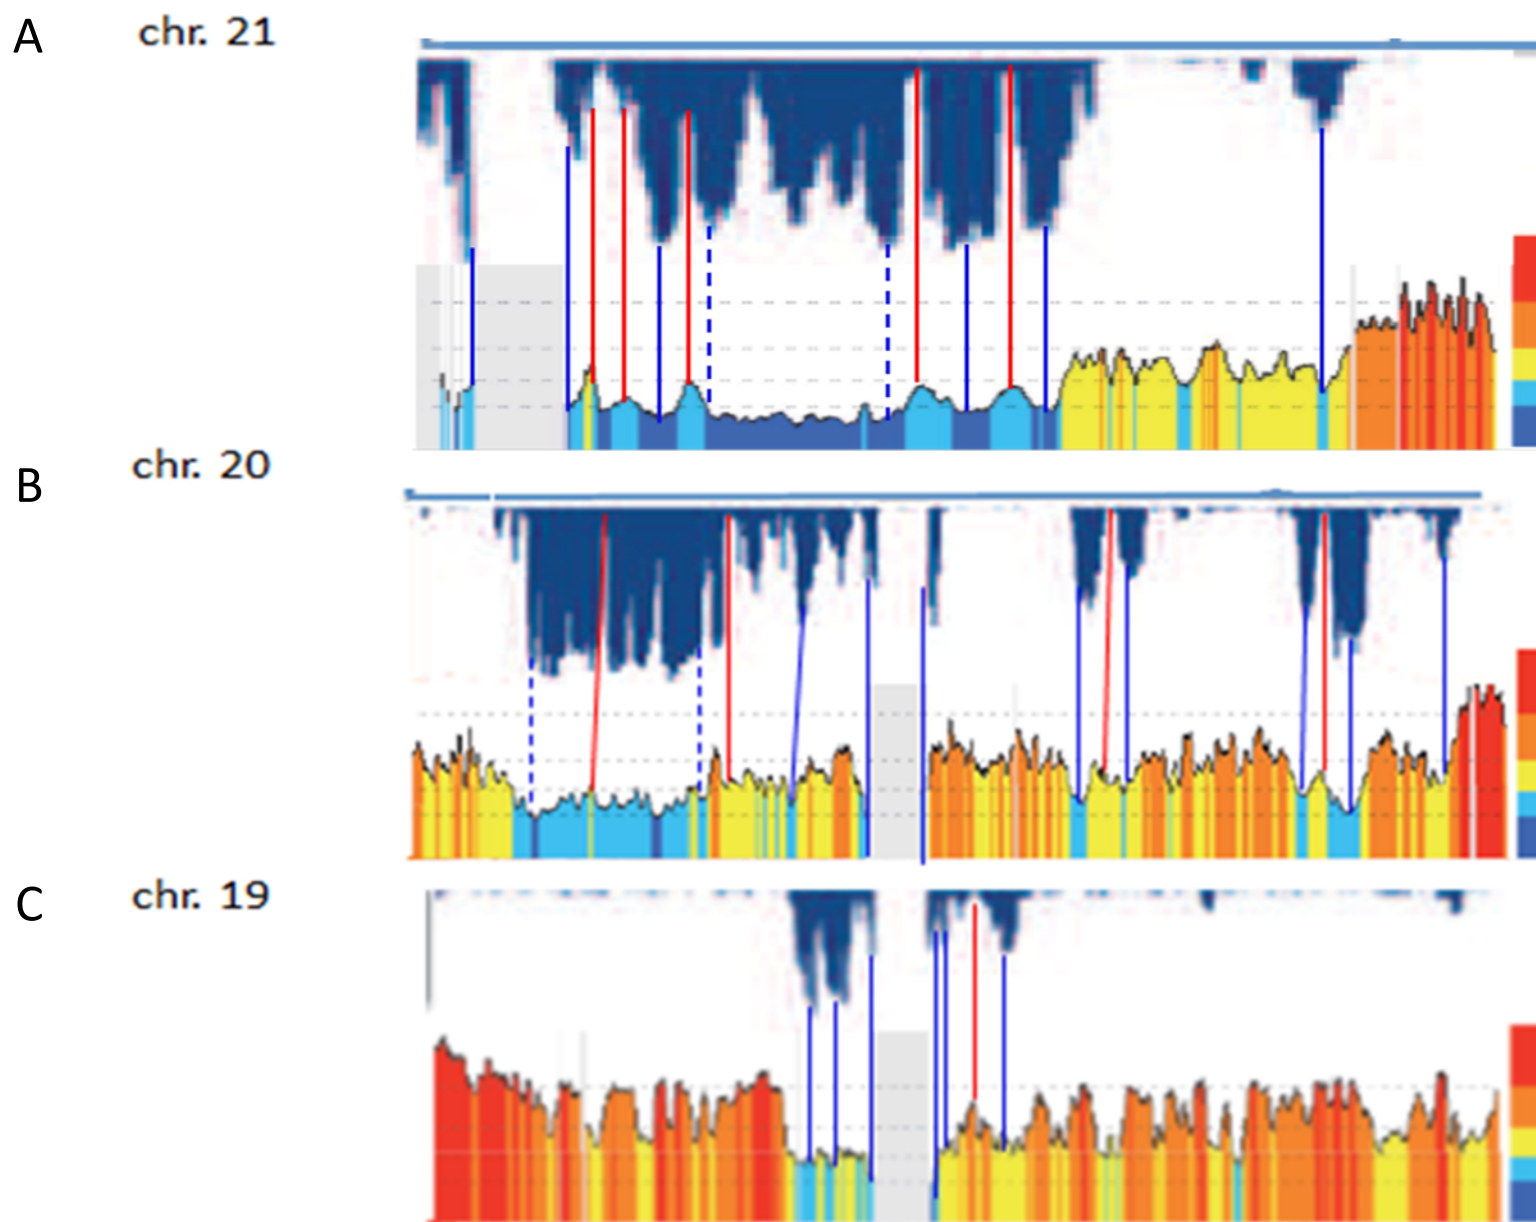

Fig. 3

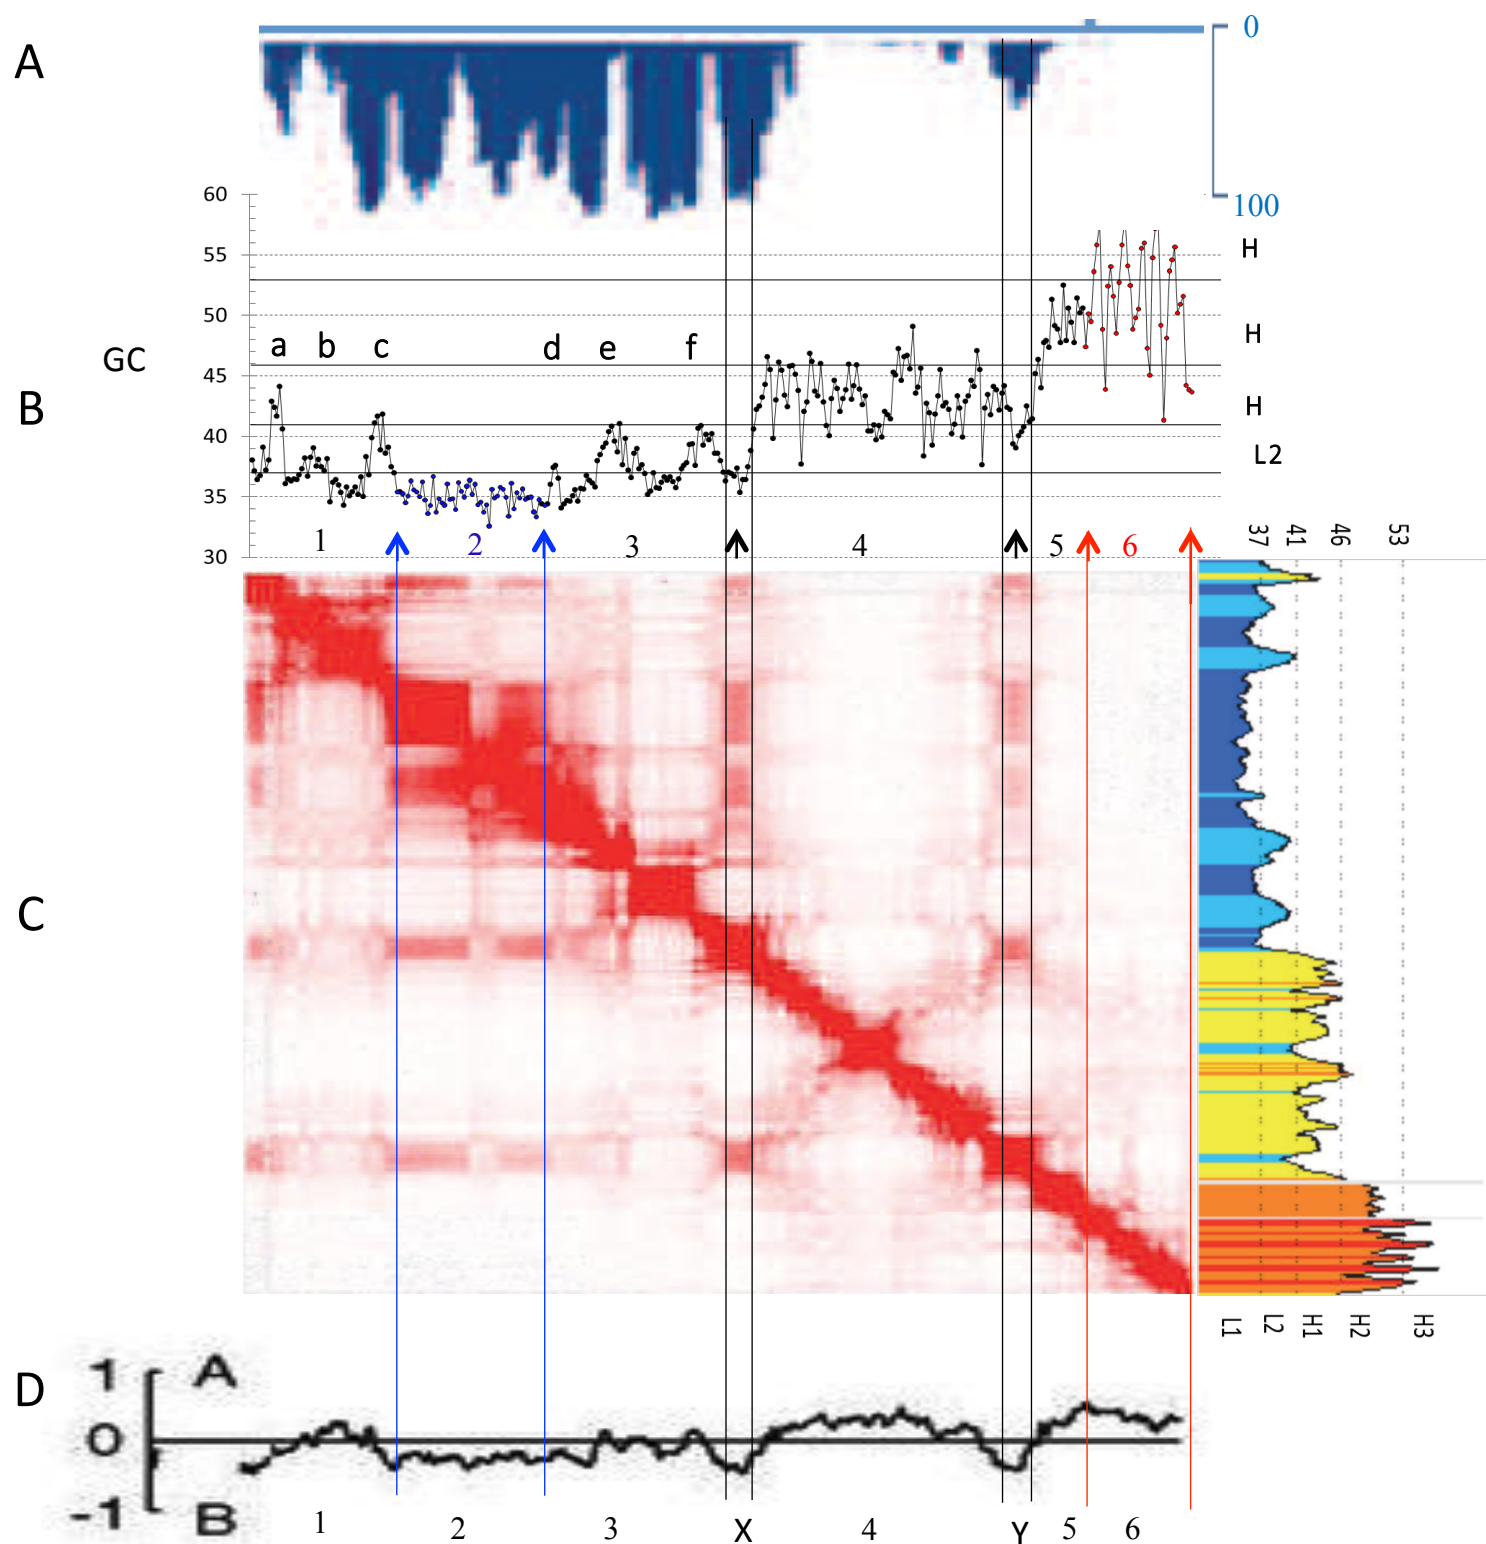

Fig. 4

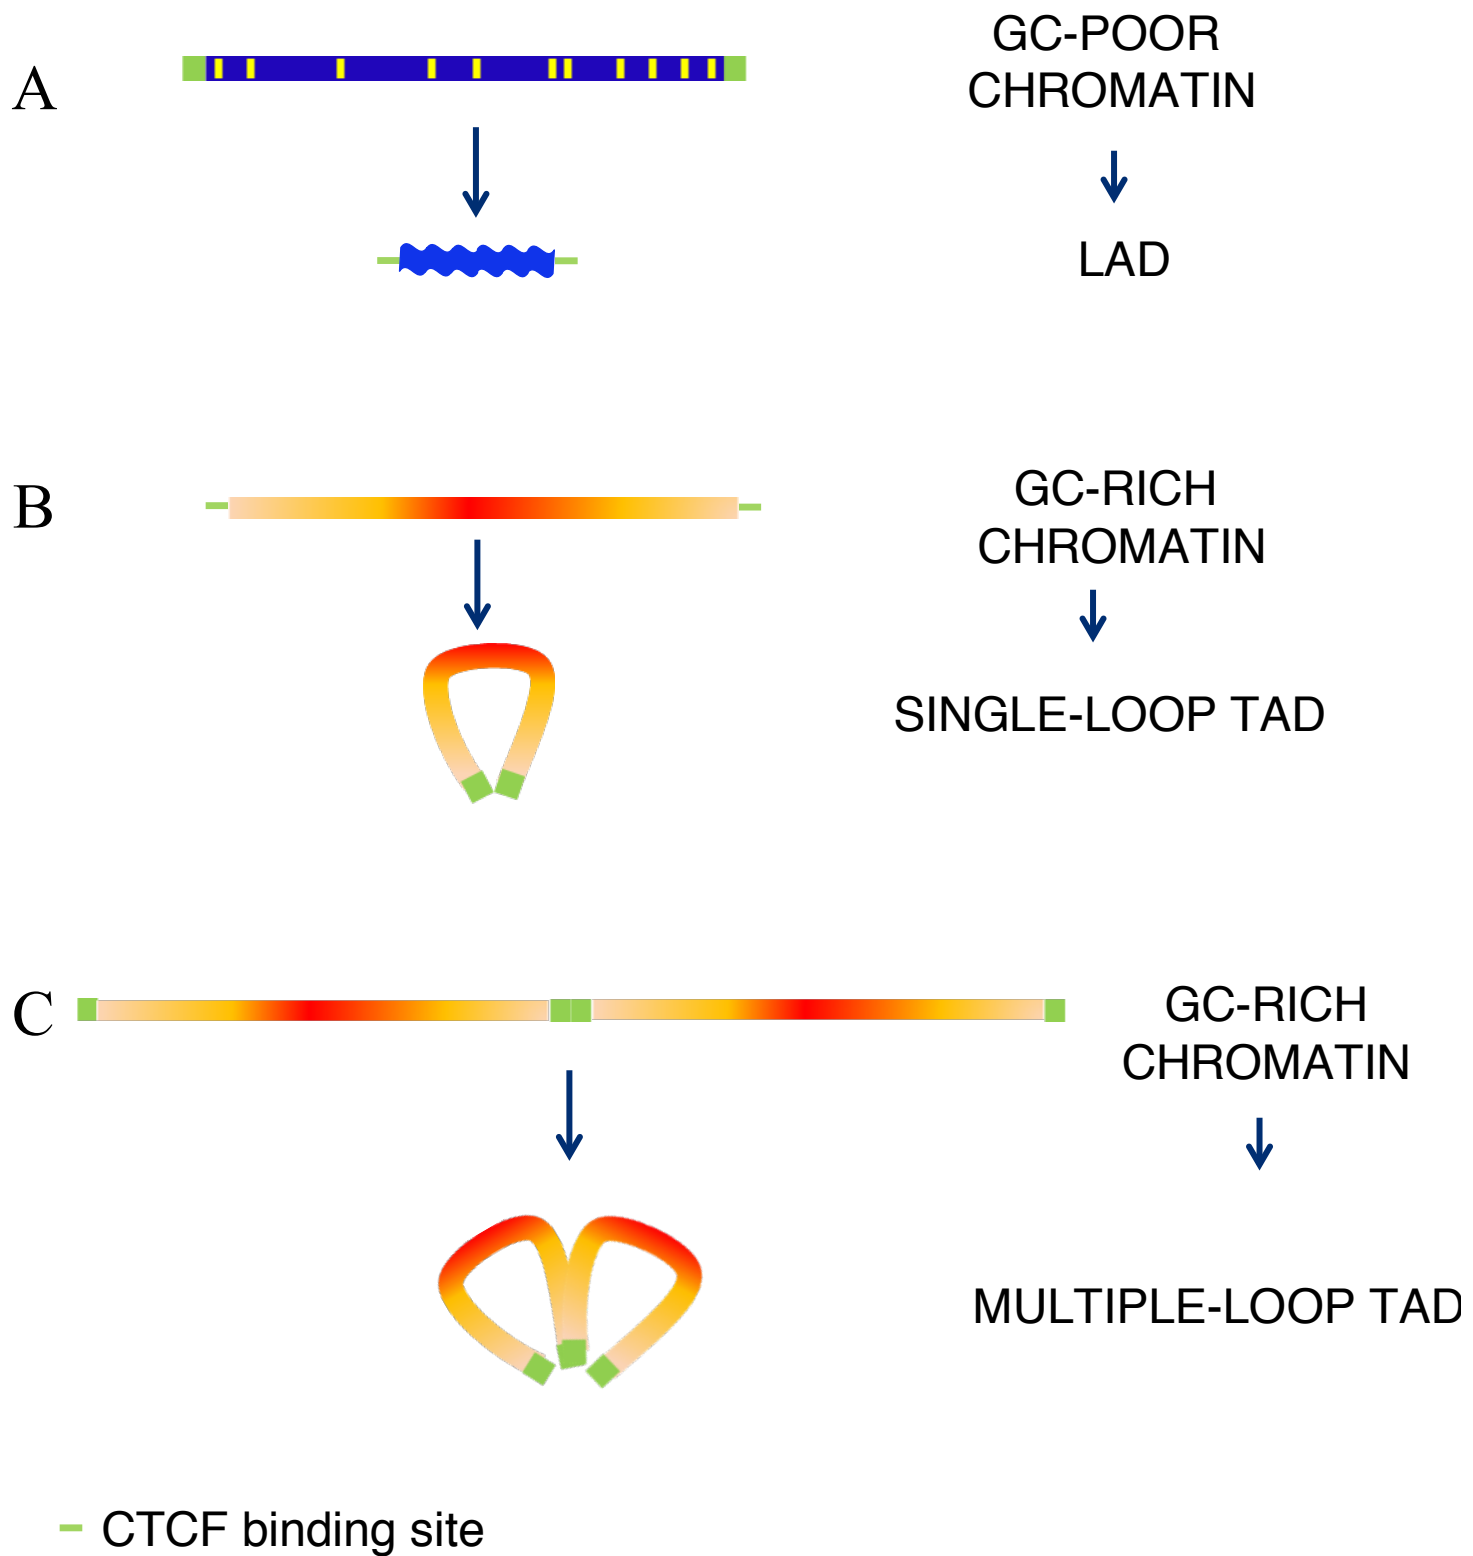

Fig. 5
